# Supplementary material for: Potential of alginate fibers incorporated with drug-loaded nanocapsules as drug delivery systems
Source: Royal Society of Chemistry journal article supplement (doi:10.1039/c4tb01392a), 2014-09-22
Supplement: c4tb01392a1.pdf [file c4tb01392a1.pdf]

**Supplementary material:**

**Fig.S1** TEM image of alginate nanocapsules without drug (a), and cumulative release of methylene blue from alginate nanocapsules with different amount of loaded drug (b).

**Fig.S2** Microscopic images of Alg (a), Alg-E6 (b) and Alg-E12 (c) fibers after immersion in distilled water for 20 min.

**Fig.S3** Processes of swelling and gel-formation of alginate fibers in different solutions.

**Fig.S4** Fitting curves of pseudo-first-order kinetics model of Alg ( $a_{1-3}$ ), Alg-E6 ( $b_{1-3}$ ) and Alg-E12 ( $c_{1-3}$ ) fibers in distilled water ( $a_1-c_1$ ), A solution ( $a_2-c_2$ ), and PBS buffer solution ( $a_3-c_3$ ).

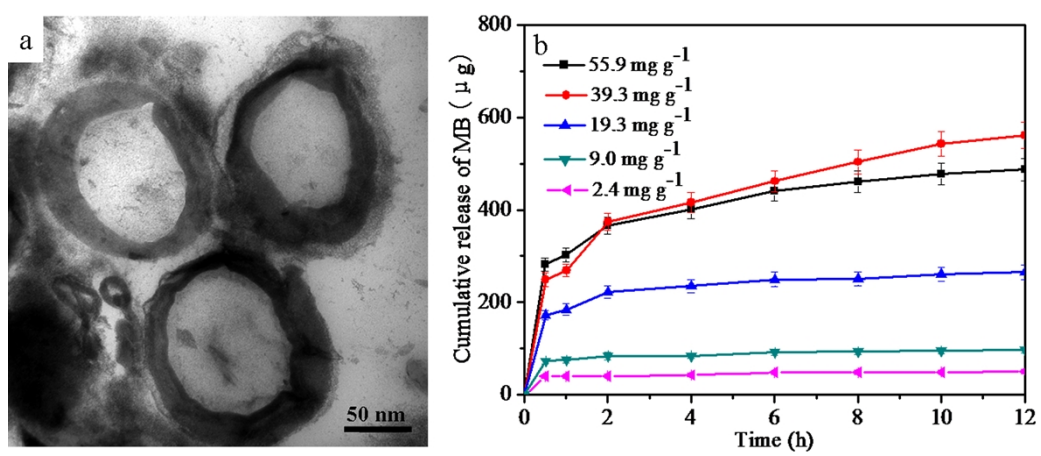

Fig. S1 *Liu et al.*

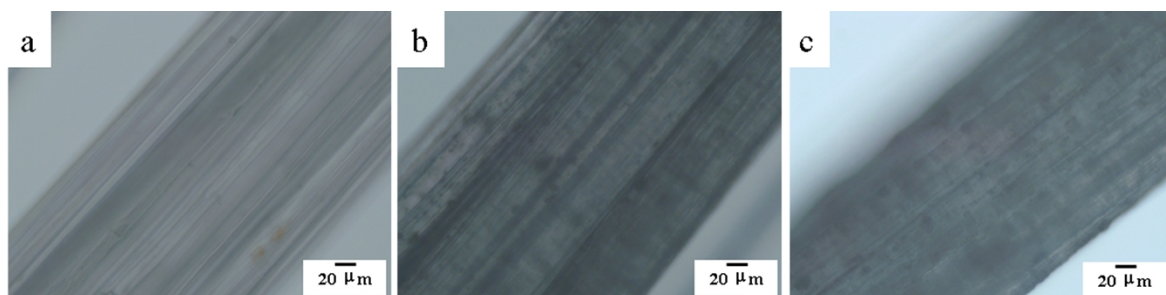

Fig. S2 *Liu et al.*

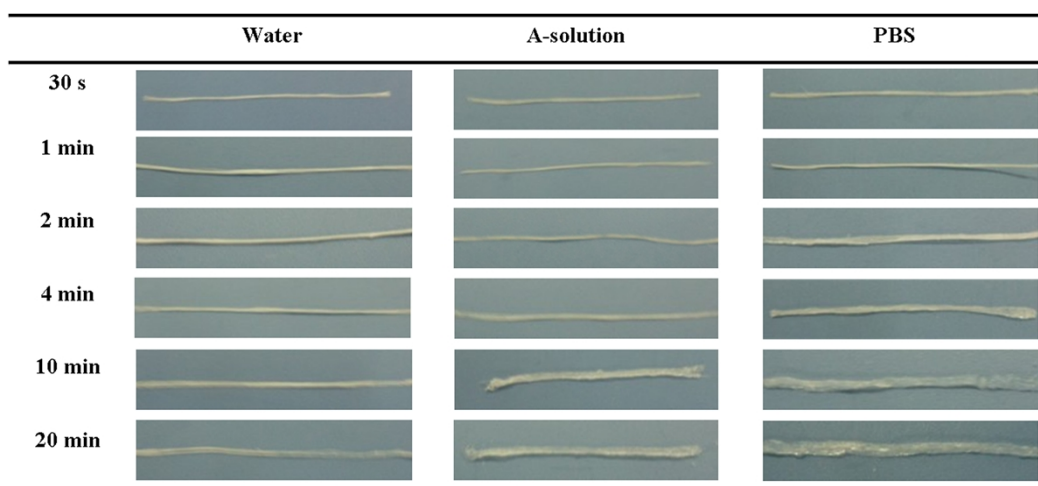

Fig. S3 Liu et al.

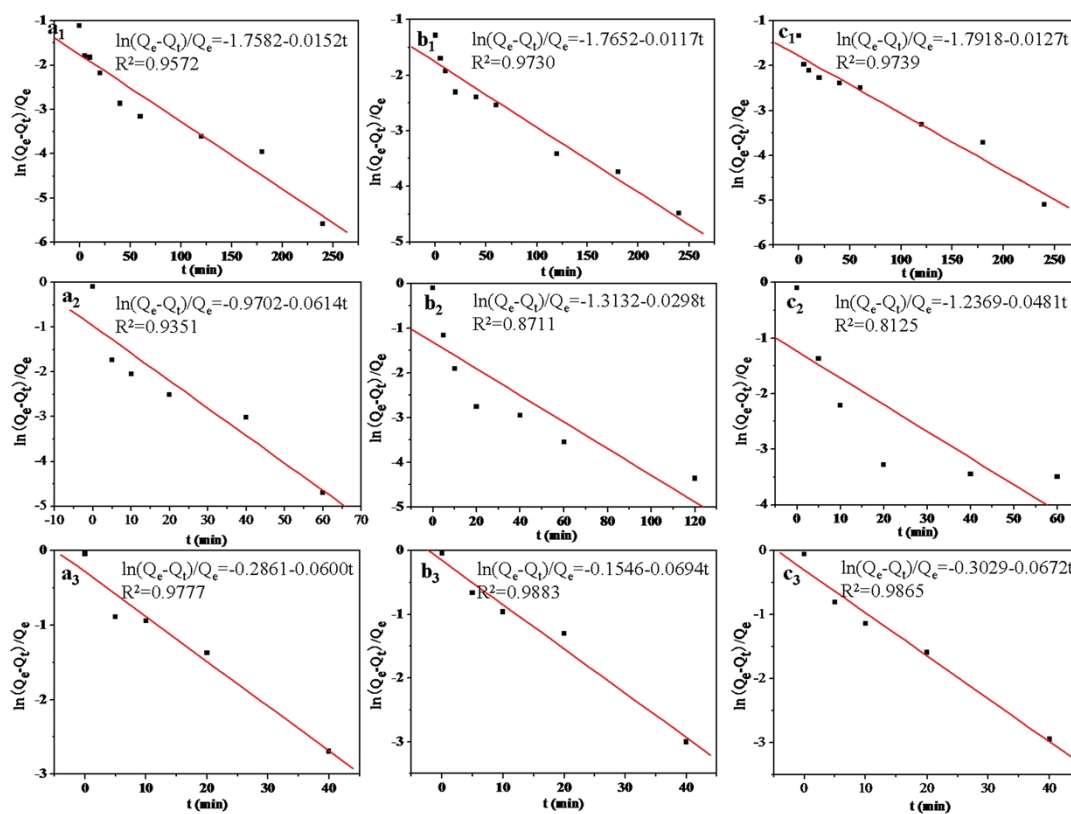

Fig. S4 Liu et al.
